# Supplementary material for: Climatic data provide clues on the geographic origin of a spider invasion in the Americas
Source: Research Square preprint supplement (doi:10.21203/rs.3.rs-572646/v1), 2021-07-30
Supplement: Supplementary file 1 [file a0abe14574af7a7b7615bd54.docx]

**Online Resource 2**
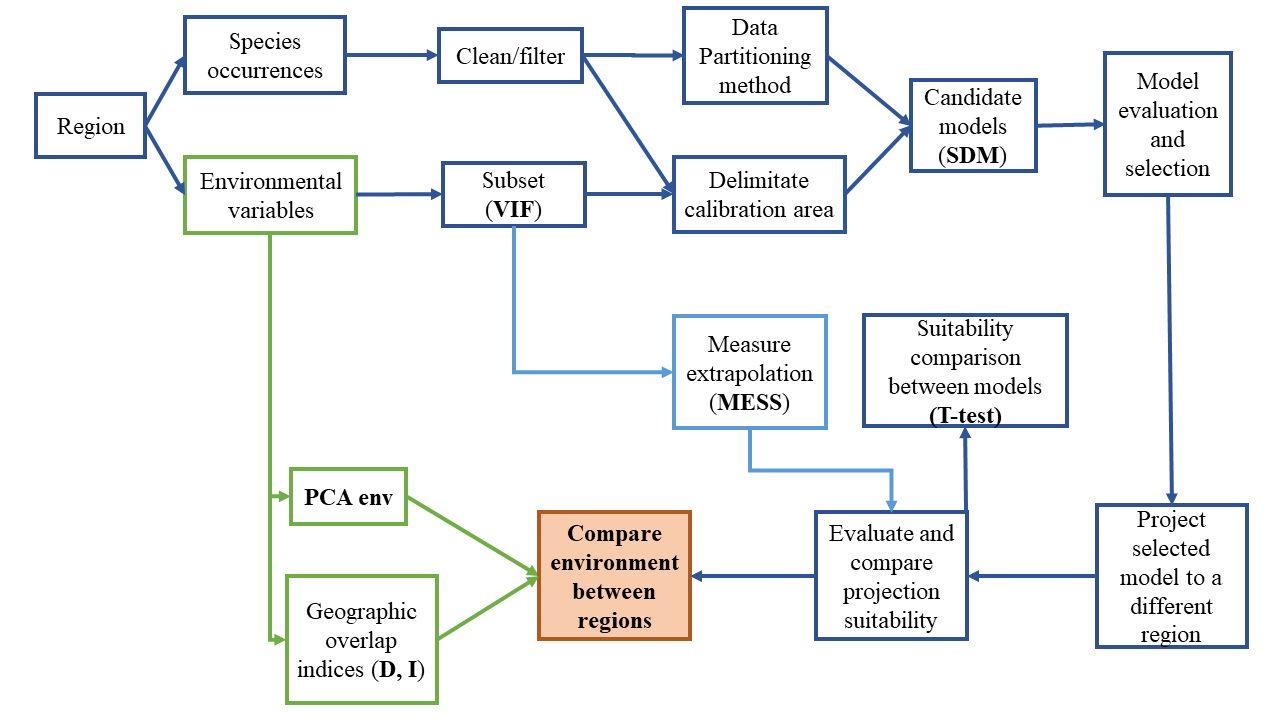


**Figure S.1** Procedure followed to conduct the data analyses for each of the selected regions
